# Supplementary material for: Incidence and predictors of surgical site infection following cesarean section in North-west Ethiopia: a prospective cohort study
Source: Springer Nature journal article supplement (doi:10.1186/s12879-020-05640-0), 2020-11-30
Supplement: MOESM3 [file 18641790]

**Title: Incidence and predictors of surgical site infection following caesarian section**

| Patient's MRN.-----                         |                                               |                                                                                                     |                   |
|---------------------------------------------|-----------------------------------------------|-----------------------------------------------------------------------------------------------------|-------------------|
| No                                          | Variable                                      | Coding categories                                                                                   | Remark            |
| 101                                         | Patients ID Number                            |                                                                                                     |                   |
| 102                                         | Age in year                                   |                                                                                                     |                   |
| 104                                         | Residence                                     | 1. Urban    2. Rural                                                                                |                   |
| 105                                         | Religion                                      | 1. Orthodox    2. Muslim    4. Protestant    4. Catholic<br>5. Other (please specify _____)         |                   |
| 106                                         | Occupation                                    | 1. House wife    2. Merchant    3. Employee    4. Student<br>5. Other specify -----                 |                   |
| 107                                         | Education                                     | 1. Not educated    2. Able to read and write    3. Primary<br>4. Secondary    5. Tertiary and above |                   |
| 108                                         | Antenatal check up                            | 1. Yes    2. No                                                                                     | If no skip to 112 |
| 109                                         | Place of ANC follow up                        | 1. DMRH    2. Outside                                                                               |                   |
| 110                                         | If outside where? Specify                     |                                                                                                     |                   |
| 111                                         | Number of prenatal care visits                |                                                                                                     |                   |
| 112                                         | Previous CS                                   | 1. Yes    2. No                                                                                     | If no skip to 114 |
| 113                                         | If yes for Question no.112 number of prior CS | _____                                                                                               |                   |
| 114                                         | Parity                                        |                                                                                                     |                   |
| 115                                         | Pre-surgery hospital stay                     |                                                                                                     |                   |
| 116                                         | Onset of labor                                | 1. Spontaneous    2. Induced    3. No labor                                                         |                   |
| Section II :Comorbidities (Medical history) |                                               |                                                                                                     |                   |
| No                                          | Variable                                      | Coding categories                                                                                   | Remark            |
| 201                                         | Hypertension (any type )                      | 1. Yes    2. No                                                                                     |                   |
| 202                                         | Diabetes mellitus                             | 1. Yes    2. No                                                                                     |                   |
| 203                                         | Renal disease                                 | 1. Yes    2. No                                                                                     |                   |
| 204                                         | Bronchial asthma                              | 1. Yes    2. No                                                                                     |                   |
| 205                                         | Thyroid dysfunctions                          | 1. Yes    2. No                                                                                     |                   |
| 206                                         | HIV                                           | 1. Positive    2. Negative    3. Unknown                                                            |                   |
| 207                                         | Hepatitis B                                   | 1. Yes    2. No    3. Unknown                                                                       |                   |
| 208                                         | Arthritis                                     | 1. Yes    2. No                                                                                     |                   |
| 209                                         | systemic steroid use                          | 1. Yes    2. No                                                                                     |                   |
| 210                                         | Anemia                                        | 1. Yes    2. No                                                                                     |                   |
| Section III: Operational related variables  |                                               |                                                                                                     |                   |
| No                                          | Variable                                      | Coding categories                                                                                   | Remark            |
| 300                                         | Date of admission dd/mm/yy                    | _____                                                                                               |                   |
| 301                                         | Rapture of membrane before CS                 | 1. Yes    2. No                                                                                     |                   |
| 302                                         | If rupture duration of ROM in hrs.            | _____                                                                                               | In hour           |
| 303                                         | Per virginal examination                      | 1. Not done    2. Done (how many) specify _____                                                     |                   |

|          |                                                                                                                          |                                                                                                                                                                                                                                                                       |           |
|----------|--------------------------------------------------------------------------------------------------------------------------|-----------------------------------------------------------------------------------------------------------------------------------------------------------------------------------------------------------------------------------------------------------------------|-----------|
| 304      | Preoperative blood transfusion                                                                                           | 1. Yes      2. No                                                                                                                                                                                                                                                     |           |
| 305      | Date of CS done dd/mm/yy                                                                                                 | _____                                                                                                                                                                                                                                                                 |           |
| 306      | Start time of CS hr/mm/second                                                                                            | _____                                                                                                                                                                                                                                                                 |           |
| 307      | End time of CS hr/mm/second                                                                                              | _____                                                                                                                                                                                                                                                                 |           |
| 308      | Duration of procedure                                                                                                    |                                                                                                                                                                                                                                                                       | In minute |
| 309      | Types of CS                                                                                                              | 1. Elective      2. Emergency                                                                                                                                                                                                                                         |           |
| 310      | Types of incision                                                                                                        | 1. Horizontal      2. Vertical                                                                                                                                                                                                                                        |           |
| 311      | Surgical wound class                                                                                                     | 1. Clean              2. Clean contaminated<br>2. Contaminated      3. Dirty/infected                                                                                                                                                                                 |           |
| 312      | Types of skin suturing                                                                                                   | 1. Interrupted<br>2. Subcuticular                                                                                                                                                                                                                                     |           |
| 313      | Number of people in theatre                                                                                              | _____                                                                                                                                                                                                                                                                 |           |
| 314      | Estimated of blood loss                                                                                                  | _____ ml                                                                                                                                                                                                                                                              |           |
| 315      | Maternal weight                                                                                                          | _____ kg                                                                                                                                                                                                                                                              |           |
| 316      | Anesthetic techniques                                                                                                    | 1. General      2. Epidural      3. Spinal                                                                                                                                                                                                                            |           |
| 317      | Indication for CS                                                                                                        | 1. Fetal distress      2. Previous CS      3. Breech presentation<br>4. Poor progress              5. Placenta Previa type 3<br>6. Severe macrosomia      7. Twin babies<br>8. Sever preeclampsia      9. Other(Specify)_____                                         |           |
| 319      | Gestational age                                                                                                          | _____ wks                                                                                                                                                                                                                                                             | In week   |
| 320      | Hemoglobin previous to cesarean                                                                                          | _____ g/dL                                                                                                                                                                                                                                                            |           |
| 321      | Hemoglobin after CS (g/dL)                                                                                               | _____ g/dL                                                                                                                                                                                                                                                            |           |
| 320      | Leukocyte count previous to cesarean (cells/ $\mu$ L)                                                                    | _____ cells/ $\mu$ L                                                                                                                                                                                                                                                  |           |
| 321      | Indwelling urethral catheter                                                                                             | 1. Yes      2. No                                                                                                                                                                                                                                                     |           |
| 322      | Soap and water bath before surgery                                                                                       | 1. Yes      2. No                                                                                                                                                                                                                                                     |           |
| 324      | Blood transfusion                                                                                                        | 1. No transfusion      2. Transfused ----- units                                                                                                                                                                                                                      |           |
| 325      | Pre-operative waiting period                                                                                             | _____ days                                                                                                                                                                                                                                                            |           |
| 326      | Prophylactic antibiotic                                                                                                  | 1. Yes      2. No                                                                                                                                                                                                                                                     |           |
| 327      | Procedure performed by                                                                                                   | 1. Gynecologist      2. Emergency surgeon<br>3. Junior surgeon      4. Other (Specify)-----                                                                                                                                                                           |           |
| 329      | Child alive                                                                                                              | 1. Yes      2. No                                                                                                                                                                                                                                                     |           |
| 330      | Sign of inflammation<br>1. At first visit -----<br>2. Second visit -----<br>3. Third visit -----<br>4. Forth visit ----- | 1. No sign of inflammation<br>2. Induration<br>3. Local site of fever<br>4. Erythema<br>5. Purulent discharge<br>6. localized swelling<br>7. dehiscence, overlying skin changes<br>8. wound deliberately opened by the surgeon for drainage<br>9. Local site of fever |           |
| 331      | Date of any sign observed dd/mm/yy                                                                                       | -----                                                                                                                                                                                                                                                                 |           |
| 332      | Date of discharge dd/mm/yy                                                                                               | -----                                                                                                                                                                                                                                                                 |           |
| <b>4</b> | <b>Regarding surgical antimicrobial prophylaxis used,</b>                                                                |                                                                                                                                                                                                                                                                       |           |

|     |                                                                 |                                                          |  |
|-----|-----------------------------------------------------------------|----------------------------------------------------------|--|
| 400 | place at which antimicrobials were administered                 | 1. Ward 2. Operation room 3. Both                        |  |
| 401 | generic name of antimicrobials                                  | 1. -----<br>2. -----<br>3. -----<br>4. -----<br>5. ----- |  |
| 402 | Time of first dose administration                               | -----                                                    |  |
| 403 | Route of administration                                         |                                                          |  |
| 404 | Time of intra-operative dose administration                     | -----                                                    |  |
| 405 | time of postoperative dose given and duration of administration | -----                                                    |  |

Sign of inflammation at least one of the following at surgical site: **Induration, Local site of fever, Erythema, Purulent discharge, Organisms isolated from fluid, localized swelling, dehiscence, overlying skin changes, wound deliberately opened by the surgeon for drainage, Surgeon declares that the wound is infected**

| Address                            | 1 | 2 | 3 |
|------------------------------------|---|---|---|
|                                    |   |   |   |
| Date of appointment for phone call |   |   |   |
